# Supplementary material
Source: PubMed Central journal article supplement (PMC2848694)
Supplement: NIHMS167622-supplement-1.pdf [file NIHMS167622-supplement-1.pdf]

*S. Typhimurium* with coincident LAMP1 staining cell was scored visually by fluorescence microscopy. Shown are means  $\pm$  SD from three independent experiments.  $^* = P < 0.001$ , Bonferroni's post-hoc test.

**Figure 7.** Intracellular virulence gene expression can be influenced by pre-invasion growth conditions. (a) *gfp*[LVA] transcriptional fusions were used to assess promoter activity for *prgH*, *sopB*, *ssaG*, *pipB* and *fliC* following invasion of HeLa cells. GFP-positive “induced” bacteria were scored visually by fluorescence microscopy. Extracellular *S. Typhimurium* were stained with anti-LPS mAb before permeabilisation and excluded from analysis. Shown are means  $\pm$  SD from at least three separate experiments.  $^* = P < 0.05$ , two-way ANOVA and Bonferroni's post-hoc analysis. (b) QuantiGene detection of *prgH*, *sopB*, *ssaJ*, *pipB* and *fliC* gene expression. The expression of each gene was normalized to *nusG* as an internal control and then compared to the value for aer-LL bacteria at 30 min. Each symbol represents the mean from one experiment in duplicate. The statistical means from three (*prgH*, *sopB* and *fliC*) or four (*ssaJ* and *pipB*) experiments are indicated by horizontal lines.

## Supplementary Material

**Figure S1.** Distribution of *S. Typhimurium* in infected HeLa cells. To obtain comparable invasion cells were infected with an m.o.i. of  $\sim 50$ -60 for aer-LL and  $\sim 150$ -180 for  $\mu$ aer-ST. Extracellular *S. Typhimurium* were stained with anti-LPS mAb before permeabilisation and excluded from analysis. After permeabilisation, all bacteria were stained with rabbit anti-LPS antibodies followed by AlexaFluor 568-conjugated secondary antibodies. The number of

intracellular *S. Typhimurium* per infected cell was scored visually. Shown are means  $\pm$  SD from three independent experiments ( $n=100$ ).

**Figure S2.** Plasmids are retained in *S. Typhimurium*. Plasmid stabilities were determined by culturing bacteria in either  $\mu$ aer-ST (a) or aer-LL (b) conditions without antibiotic selection, thereafter bacteria were plated on LB-Miller agar with or without carbenicillin. Shown are means  $\pm$  SD from three independent experiments.

**Figure S3.** Motility of *S. Typhimurium* strains. Flagellar function was determined by rate of spread, after 6 h incubation at 37 °C in semisolid agar. Strains were WT *S. Typhimurium* (WT), *fliC::Tn10* (*fliC*), *fljB::Mud-Cm* mutant (*fljB*), *fliC::Tn10 fljB::Mud-Cm* mutant (*fliC/fljB*), WT *S. Typhimurium* bearing pFPV25.1 (pFPV25.1) or *PprgH-gfp*[LVA] (*PprgH-gfp*[LVA]). Shown are means  $\pm$  SD, from three independent experiments.

**Figure S4.** Electron micrographs showing flagella (black arrows) on the surface of aer-LL and  $\mu$ aer-ST bacteria, but fimbriae (white arrows) only on the surface of  $\mu$ aer-ST bacteria. Scale bars are 500 nm (left panels) or 100 nm (right panels).

**Table S1.** Genome wide-expression changes for aer-LL compared to  $\mu$ aer-ST *S. Typhimurium* SL1344. Probe-set identification (ID) for *S. Typhimurium* SL1344 is shown and the corresponding *S. Typhimurium* LT2 gene or synonym is denoted where identified by BLAST analysis. Check marks show genes where both a 2-fold (aer-LL/ $\mu$ aer-ST fold  $\Delta$ ) change and *P*-value passing the false discovery rate at a significant level was obtained (2X and *P*-value Sig.).
