# Supplementary material
Source: PubMed Central journal article supplement (PMC2848694)
Supplement: NIHMS167622-supplement-Supp_Figs.pdf [file NIHMS167622-supplement-Supp_Figs.pdf]

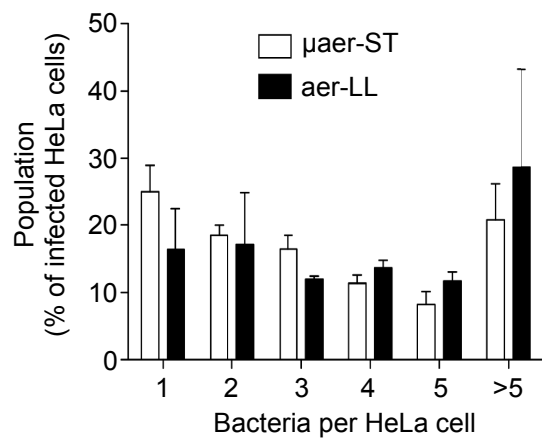

Supplementary Figure S1.

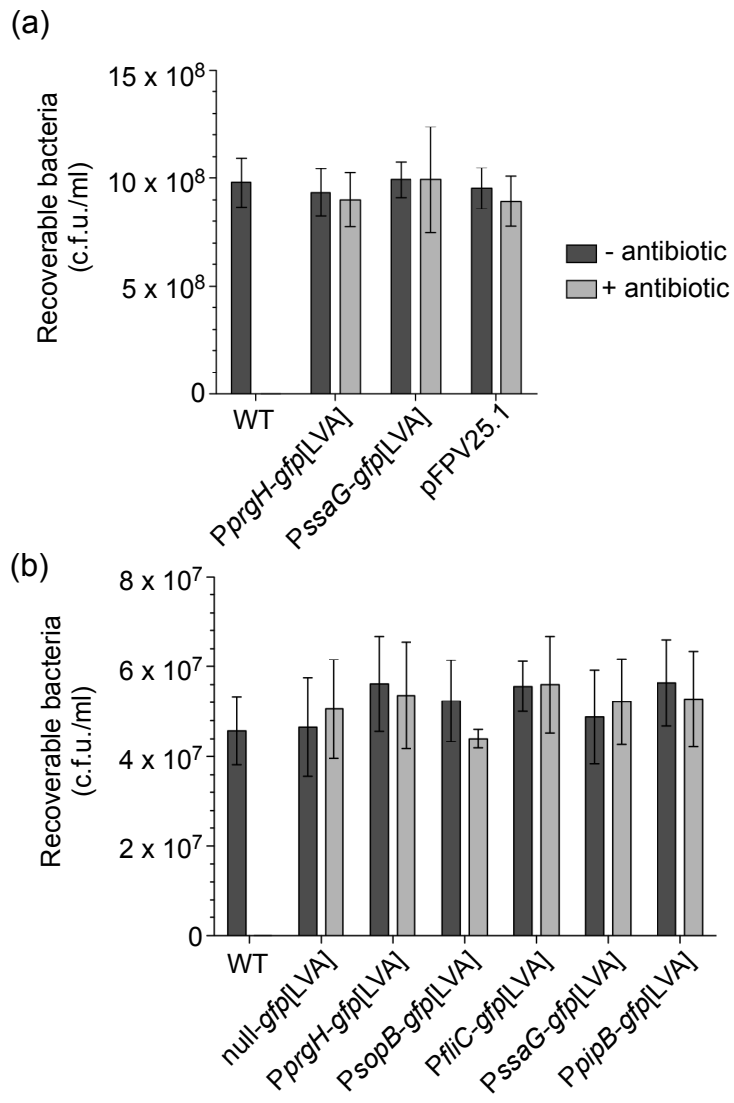

Supplementary Figure S2.

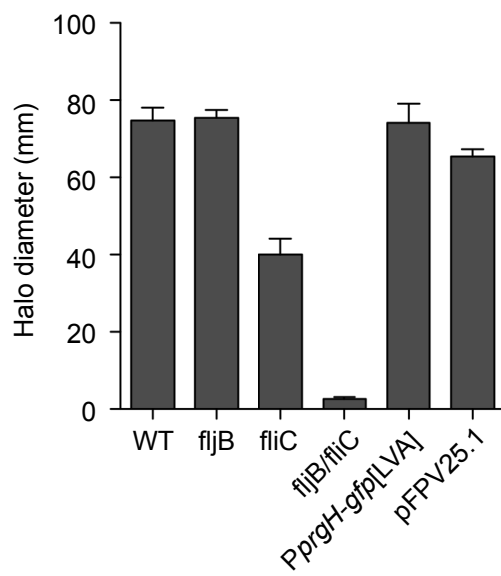

Supplementary Figure S3.

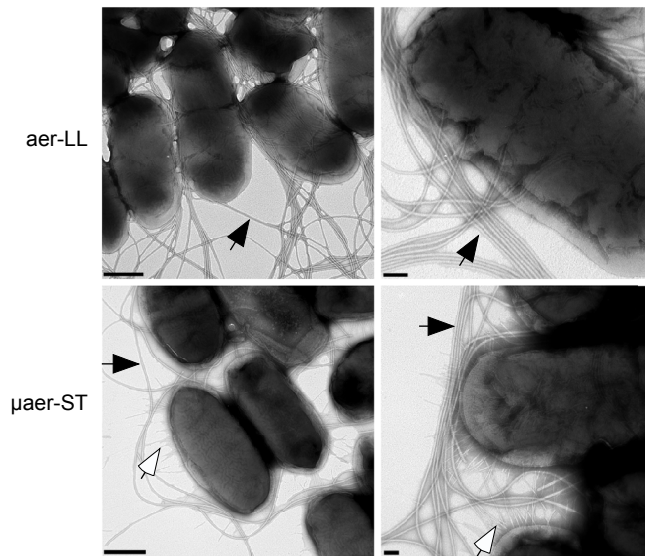

Supplementary Figure S4.
